# Supplementary material for: Adlay seed hull polysaccharide as a green corrosion inhibitor for mild steel in acid solution: surface analyses and theoretical calculations
Source: Royal Society of Chemistry journal article supplement (doi:10.1039/d1nj04238f), 2021-01-01
Supplement: d1nj04238f1.pdf [file d1nj04238f1.pdf]

Journal Name

ARTICLE

## Adlay seed hull polysaccharide as a green corrosion inhibitor for mild steel in acid solution: Surface analyses and theoretical calculations

Cai-Yang Chen,<sup>a</sup> Chong Yu,<sup>b</sup> Hui-Jing Li,<sup>\*a</sup> Chi Zhang<sup>a</sup>, Weiwei Zhang<sup>\*c</sup>, and Yan-Chao Wu<sup>\*a</sup>

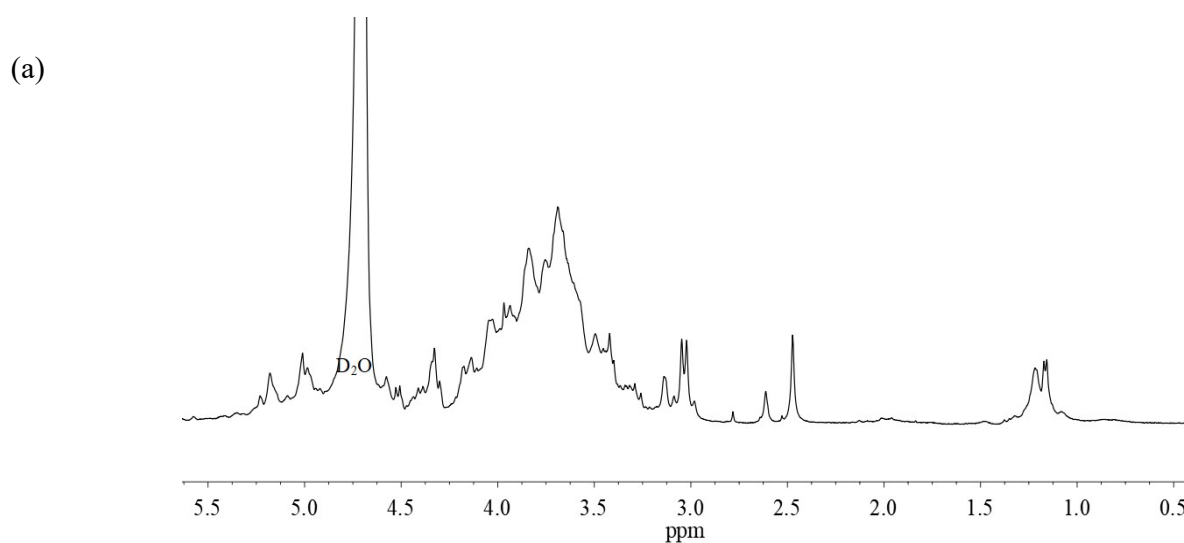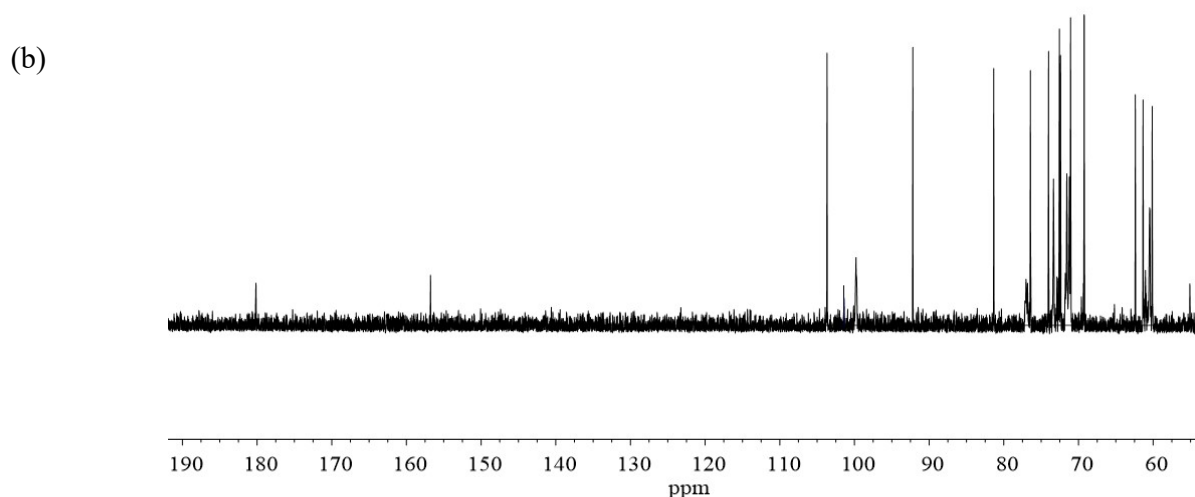

Fig. S1 1D NMR spectra of ASP, (Spectra were performed at 298K on a Bruker Avance III 400 MHz spectrometer).

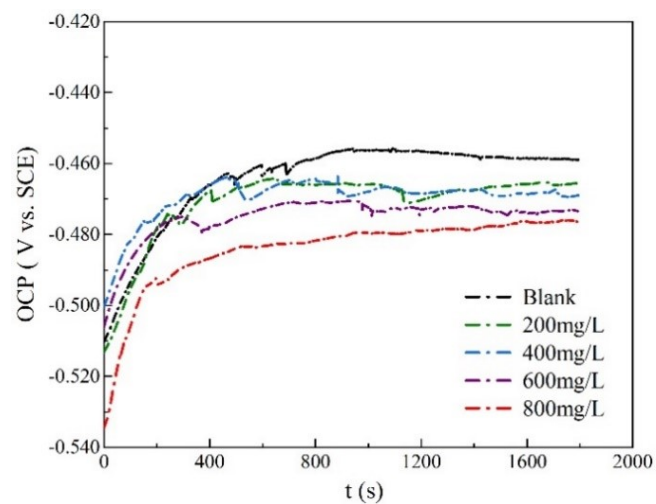

Fig. S2 The OCP curves for mild steel in 1 M HCl with different concentrations of ASP during 1800 s.

<sup>a</sup> Weihai Marine Organism & Medical Technology Research Institute, Harbin Institute of Technology, Weihai 264209, China. E-mails: lihuijing@iccas.ac.cn, ycwu@iccas.ac.cn

<sup>b</sup> Department of pharmaceuticals, Harbin medical University, Daqing 163319, China

<sup>c</sup> Chemistry and Chemical Engineering, Qufu Normal University, Qufu 273165, China. E-mail: qfzhangweiwei@163.com
